# Supplementary material for: Lifetime cannabis exposure and small airway function in a population-based cohort study
Source: PubMed Central journal article supplement — ERJ Open Res. 2022 May 3;8(2):00688-2021. doi: 10.1183/23120541.00688-2021 (PMC9062301; doi:10.1183/23120541.00688-2021), 2022-05-03
Supplement: 00688-2021.SUPPLEMENT.pdf [file 00688-2021.SUPPLEMENT.pdf]

**Lifetime cannabis exposure and small airway function in a population-based cohort study**

Hua Shin Tan, Helena M. McAnally, Jack Dummer, Robert J Hancox

**Online supplement**

Supplementary Table 1: Post-bronchodilator IOS values at age 45 years

|        | Women    |       |             | Men      |       |             |
|--------|----------|-------|-------------|----------|-------|-------------|
|        | <i>n</i> | Mean  | 95% CI      | <i>n</i> | Mean  | 95% CI      |
| R5     | 440      | 4.15  | 4.02 4.29   | 453      | 3.68  | 3.56 3.79   |
| R20    | 440      | 3.54  | 3.43 3.65   | 453      | 3.22  | 3.12 3.32   |
| R5-R20 | 440      | 0.61  | 0.55 0.68   | 453      | 0.46  | 0.41 0.50   |
| X5     | 439      | -2.16 | -2.66 -1.64 | 452      | -1.37 | -1.61 -1.13 |
| Ax     | 434      | 3.49  | 3.18 3.80   | 444      | 2.38  | 2.10 2.67   |
| Fres   | 438      | 11.40 | 11.07 11.75 | 451      | 10.32 | 10.01 10.64 |

Note: means are geometric means of raw IOS values. The *n* values differ slightly because of missing data. R5=resistance at 5Hz, R20=resistance at 20Hz, R5-R20= difference between R5 and R20, X5= reactance at 5Hz, AX= area under the reactance curve between 5 and Fres, Fres= Resonant frequency.

Supplementary Table 2: Pre-bronchodilator IOS values at age 45 years by smoking status.

|                          | Women    |       |        | Men   |          |       |        |       |
|--------------------------|----------|-------|--------|-------|----------|-------|--------|-------|
|                          | <i>n</i> | Mean  | 95% CI |       | <i>n</i> | Mean  | 95% CI |       |
| Never smokers            |          |       |        |       |          |       |        |       |
| R5                       | 110      | 5.02  | 4.71   | 5.33  | 82       | 4.22  | 3.87   | 4.58  |
| R20                      | 110      | 4.05  | 3.81   | 4.30  | 82       | 3.47  | 3.16   | 3.79  |
| R5-R20                   | 110      | 0.96  | 0.80   | 1.12  | 82       | 0.75  | 0.62   | 0.89  |
| X5                       | 110      | -1.50 | -1.64  | -1.36 | 82       | -1.05 | -1.16  | -0.93 |
| Ax                       | 110      | 6.46  | 5.39   | 7.57  | 81       | 4.26  | 3.36   | 5.20  |
| Fres                     | 110      | 14.07 | 13.18  | 14.97 | 81       | 12.97 | 11.98  | 13.99 |
| Cannabis users only      |          |       |        |       |          |       |        |       |
| R5                       | 99       | 5.17  | 4.79   | 5.55  | 145      | 4.43  | 4.16   | 4.70  |
| R20                      | 99       | 4.18  | 3.88   | 4.48  | 145      | 3.62  | 3.42   | 3.83  |
| R5-R20                   | 99       | 1.00  | 0.82   | 1.17  | 145      | 0.82  | 0.68   | 0.95  |
| X5                       | 98       | -1.57 | -1.73  | -1.42 | 145      | -1.18 | -1.31  | -1.06 |
| Ax                       | 98       | 6.66  | 5.52   | 7.85  | 145      | 4.67  | 3.77   | 5.60  |
| Fres                     | 99       | 14.57 | 13.60  | 15.56 | 145      | 12.89 | 12.16  | 13.63 |
| Tobacco users only       |          |       |        |       |          |       |        |       |
| R5                       | 40       | 5.07  | 4.59   | 5.57  | 10       | 5.56  | 3.58   | 7.70  |
| R20                      | 40       | 4.01  | 3.65   | 4.39  | 10       | 4.04  | 3.26   | 4.85  |
| R5-R20                   | 40       | 1.05  | 0.72   | 1.39  | 10       | 1.55  | 0.06   | 3.15  |
| X5                       | 40       | -1.63 | -2.00  | -1.26 | 10       | -1.95 | -3.45  | -0.31 |
| Ax                       | 40       | 6.93  | 4.46   | 9.65  | 10       | 9.36  | 1.22   | 20.63 |
| Fres                     | 40       | 14.15 | 12.62  | 15.75 | 10       | 15.34 | 10.61  | 20.80 |
| Cannabis & Tobacco users |          |       |        |       |          |       |        |       |
| R5                       | 191      | 5.31  | 5.02   | 5.61  | 217      | 4.58  | 4.38   | 4.78  |
| R20                      | 191      | 4.23  | 4.01   | 4.45  | 217      | 3.73  | 3.57   | 3.89  |
| R5-R20                   | 191      | 1.09  | 0.93   | 1.25  | 217      | 0.85  | 0.75   | 0.96  |
| X5                       | 191      | -1.66 | -1.82  | -1.50 | 217      | -1.22 | -1.32  | -1.11 |
| Ax                       | 188      | 7.53  | 6.37   | 8.75  | 213      | 5.02  | 4.29   | 5.77  |
| Fres                     | 190      | 14.36 | 13.57  | 15.16 | 216      | 13.10 | 12.43  | 13.78 |

Note: means are geometric means of raw IOS values. The *n* values differ slightly because of missing data. R5=resistance at 5Hz, R20=resistance at 20Hz, R5-R20= difference between R5 and R20, X5= reactance at 5Hz, AX= area under the reactance curve between 5 and Fres, Fres= Resonant frequency.

Never smokers did not report any life-time cannabis or tobacco use (joint-years and pack-years both =0)

Supplementary Table 3: Pre- and Post- Salbutamol IOS Spearman Correlations in Women at age 45.

|                         | R5     | R20    | R5-R20 | X5     | AX     |
|-------------------------|--------|--------|--------|--------|--------|
| Pre-Salbutamol (n=436)  |        |        |        |        |        |
| R20                     | 0.85   |        |        |        |        |
| <i>p</i>                | <0.001 |        |        |        |        |
| R5-R20                  | 0.54   | 0.07   |        |        |        |
| <i>p</i>                | <0.001 | 0.14   |        |        |        |
| X5                      | 0.65   | 0.38   | 0.68   |        |        |
| <i>p</i>                | <0.001 | <0.001 | <0.001 |        |        |
| AX                      | 0.66   | 0.26   | 0.91   | 0.89   |        |
| <i>p</i>                | <0.001 | <0.001 | <0.001 | <0.001 |        |
| Fres                    | 0.57   | 0.17   | 0.92   | 0.74   | 0.94   |
| <i>p</i>                | <0.001 | <0.001 | <0.001 | <0.001 | <0.001 |
| Post-Salbutamol (n=433) |        |        |        |        |        |
| R20                     | 0.85   |        |        |        |        |
| <i>p</i>                | <0.001 |        |        |        |        |
| R5-R20                  | 0.42   | -0.05  |        |        |        |
| <i>p</i>                | <0.001 | 0.31   |        |        |        |
| X5                      | 0.44   | 0.26   | 0.42   |        |        |
| <i>p</i>                | <0.001 | <0.001 | <0.001 |        |        |
| AX                      | 0.51   | 0.16   | 0.78   | 0.69   |        |
| <i>p</i>                | <0.001 | <0.001 | <0.001 | <0.001 |        |
| Fres                    | 0.43   | 0.01   | 0.91   | 0.56   | 0.89   |
| <i>p</i>                | <0.001 | 0.81   | <0.001 | <0.001 | <0.001 |

Coefficient *rho* statistics are for correlations between log transformed variables.

R5=resistance at 5Hz, R20=resistance at 20Hz, R5-R20= difference between R5 and R20, X5= reactance at 5Hz, AX= area under the reactance curve, Fres= Resonant frequency.

Supplementary Table 4: Pre- and Post- Salbutamol IOS Spearman Correlations in Men at age 45.

|                         | R5     | R20    | R5-R20 | X5     | AX     |
|-------------------------|--------|--------|--------|--------|--------|
| Pre-Salbutamol (n=449)  |        |        |        |        |        |
| R20                     | 0.88   |        |        |        |        |
| <i>p</i>                | <0.001 |        |        |        |        |
| R5-R20                  | 0.53   | 0.12   |        |        |        |
| <i>p</i>                | <0.001 | 0.01   |        |        |        |
| X5                      | 0.62   | 0.38   | 0.65   |        |        |
| <i>p</i>                | <0.001 | <0.001 | <0.001 |        |        |
| AX                      | 0.60   | 0.24   | 0.90   | 0.86   |        |
| <i>p</i>                | <0.001 | <0.001 | <0.001 | <0.001 |        |
| Fres                    | 0.52   | 0.15   | 0.93   | 0.72   | 0.95   |
| <i>p</i>                | <0.001 | <0.001 | <0.001 | <0.001 | <0.001 |
| Post-Salbutamol (n=443) |        |        |        |        |        |
| R20                     | 0.93   |        |        |        |        |
| <i>p</i>                | <0.001 |        |        |        |        |
| R5-R20                  | 0.33   | -0.01  |        |        |        |
| <i>p</i>                | <0.001 | 0.85   |        |        |        |
| X5                      | 0.34   | 0.20   | 0.45   |        |        |
| <i>p</i>                | <0.001 | <0.001 | <0.001 |        |        |
| AX                      | 0.39   | 0.12   | 0.80   | 0.79   |        |
| <i>p</i>                | <0.001 | 0.01   | <0.001 | <0.001 |        |
| Fres                    | 0.30   | 0.01   | 0.89   | 0.61   | 0.93   |
| <i>p</i>                | <0.001 | 0.90   | <0.001 | <0.001 | <0.001 |

Coefficient *rho* statistics are for correlations between log transformed variables.

R5=resistance at 5Hz, R20=resistance at 20Hz, R5-R20= difference between R5 and R20, X5= reactance at 5Hz, AX= area under the reactance curve, Fres= Resonant frequency.

Supplementary Table 5: Adjusted associations of cannabis and tobacco with post-bronchodilator IOS measures for the whole sample.

|                               |          | IOS Measures <sup>a</sup> |              |              |              |              |              |
|-------------------------------|----------|---------------------------|--------------|--------------|--------------|--------------|--------------|
|                               |          | R5                        | R20          | R5-R20       | X5           | AX           | Fres         |
| <i>n</i>                      |          | 874                       | 874          | 874          | 874          | 859          | 862          |
| Joint Years                   | $\beta$  | 0.067                     | 0.056        | 0.026        | 0.020        | 0.056        | 0.069        |
|                               | 95% CI   | -0.003-0.138              | -0.018-0.130 | -0.039-0.092 | -0.053-0.092 | -0.014-0.125 | -0.001-0.139 |
|                               | <i>p</i> | 0.061                     | 0.137        | 0.431        | 0.594        | 0.114        | 0.055        |
| Pack Years                    | $\beta$  | <b>0.111</b>              | <b>0.086</b> | <b>0.070</b> | <b>0.086</b> | <b>0.078</b> | <b>0.089</b> |
|                               | 95% CI   | 0.041-0.182               | 0.12-0.160   | 0.004-0.135  | 0.013-0.158  | 0.008-0.147  | 0.018-0.159  |
|                               | <i>p</i> | 0.002                     | 0.022        | 0.037        | 0.021        | 0.028        | 0.014        |
| Interaction term <sup>b</sup> | <i>p</i> | 0.079                     | 0.096        | 0.598        | 0.559        | 0.369        | 0.204        |

<sup>a</sup> All IOS measures are log-transformed and analyses are adjusted for use of both substances and also adjusted for sex, BMI, and height; bolded values are statistically significant.  $\beta$  values are standardised regression coefficients, which represent the standard deviation difference in IOS measure associated with each standard deviation change in joint- or pack-years.

<sup>b</sup> Interaction term p-values are for joint years by sex in the adjusted model for each IOS measure tested for after the adjusted model was run

Supplementary Table 6: Adjusted associations of cannabis and tobacco with post-bronchodilator IOS measures stratified by sex.

|             |         | IOS Measures <sup>a</sup> |              |              |              |              |              |
|-------------|---------|---------------------------|--------------|--------------|--------------|--------------|--------------|
|             |         | R5                        | R20          | R5-R20       | X5           | AX           | Fres         |
| Women       | n       | 433                       | 433          | 433          | 433          | 427          | 428          |
| Joint-years | $\beta$ | <b>0.134</b>              | <b>0.152</b> | -0.013       | 0.074        | 0.094        | 0.082        |
|             | 95% CI  | 0.009-0.260               | 0.021-0.283  | -0.146-0.120 | -0.061-0.208 | -0.025-0.214 | -0.047-0.210 |
|             | p       | 0.036                     | 0.023        | 0.848        | 0.281        | 0.121        | 0.212        |
| Pack-years  | $\beta$ | <b>0.118</b>              | 0.053        | <b>0.157</b> | 0.034        | 0.062        | <b>0.134</b> |
|             | 95% CI  | 0.004-0.232               | -0.066-0.171 | 0.036-0.277  | -0.088-0.156 | -0.045-0.169 | 0.018-0.251  |
|             | p       | 0.042                     | 0.384        | 0.011        | 0.582        | 0.257        | 0.024        |
| Men         | n       | 441                       | 441          | 441          | 441          | 432          | 434          |
| Joint-years | $\beta$ | 0.038                     | 0.013        | 0.047        | -0.006       | 0.038        | 0.064        |
|             | 95% CI  | -0.048-0.124              | -0.077-0.104 | -0.019-0.114 | -0.091-0.079 | -0.050-0.125 | -0.019-0.146 |
|             | p       | 0.382                     | 0.772        | 0.161        | 0.891        | 0.398        | 0.130        |
| Pack-years  | $\beta$ | <b>0.102</b>              | <b>0.101</b> | 0.015        | <b>0.115</b> | 0.086        | 0.058        |
|             | 95% CI  | 0.011-0.192               | 0.005-0.197  | -0.055-0.085 | 0.026-0.205  | -0.007-0.178 | -0.030-0.145 |
|             | p       | 0.028                     | 0.038        | 0.678        | 0.012        | 0.070        | 0.194        |

<sup>a</sup> All IOS measures are log-transformed and analyses are adjusted for use of both substances and also adjusted for BMI and height; bolded values are statistically significant.  $\beta$  values are standardised regression coefficients, which represent the standard deviation difference in IOS measure associated with each standard deviation change in joint- or pack-years.

Supplementary Table 7: Adjusted associations of cannabis use with pre-bronchodilator IOS measures among the sub-sample who never used tobacco.

| Pre-bronchodilator |          | IOS Measures <sup>a</sup> |              |              |              |              |             |
|--------------------|----------|---------------------------|--------------|--------------|--------------|--------------|-------------|
|                    |          | R5                        | R20          | R5-R20       | X5           | AX           | Fres        |
|                    | <i>n</i> | 425                       | 425          | 425          | 424          | 423          | 424         |
| Joint Years        | $\beta$  | 0.084                     | 0.032        | 0.114        | 0.010        | 0.112        | 0.148       |
|                    | 95% CI   | -0.094-0.261              | -0.159-0.223 | -0.056-0.284 | -0.143-0.164 | -0.053-0.277 | -0.25-0.320 |
|                    | <i>p</i> | 0.355                     | 0.741        | 0.187        | 0.894        | 0.183        | 0.094       |

<sup>a</sup> All IOS measures are log-transformed and analyses are adjusted for adjusted for sex, BMI, and height.  $\beta$  values are standardised regression coefficients, which represent the standard deviation difference in IOS measure associated with each standard deviation change in joint- or pack-years.



Supplementary Table 8: Associations of cannabis and tobacco with pre-bronchodilator IOS measures for the whole sample adjusted for childhood and adult socio-economic status.

| Pre-bronchodilator |          | IOS Measures <sup>a</sup> |              |              |              |              |              |
|--------------------|----------|---------------------------|--------------|--------------|--------------|--------------|--------------|
|                    |          | R5                        | R20          | R5-R20       | X5           | AX           | Fres         |
| <i>n</i>           |          | 873                       | 873          | 873          | 872          | 864          | 866          |
| Joint Years        | $\beta$  | <b>0.098</b>              | 0.073        | <b>0.076</b> | <b>0.106</b> | <b>0.122</b> | <b>0.119</b> |
|                    | 95% CI   | 0.026-0.170               | -0.003-0.148 | 0.002-0.149  | 0.038-0.175  | 0.051-0.193  | 0.048-0.191  |
|                    | <i>p</i> | 0.008                     | 0.058        | 0.043        | 0.002        | 0.001        | 0.001        |
| Pack Years         | $\beta$  | 0.023                     | -0.007       | 0.054        | 0.043        | 0.036        | 0.015        |
|                    | 95% CI   | -0.051-0.098              | -0.085-0.072 | -0.022-0.131 | -0.028-0.114 | -0.038-0.110 | -0.059-0.090 |
|                    | <i>p</i> | 0.540                     | 0.869        | 0.160        | 0.236        | 0.346        | 0.689        |

<sup>a</sup> All IOS measures are log-transformed and analyses are adjusted for use of both substances and also adjusted for sex, BMI, height, average SES from birth to 15 and SES at age 45; bolded values are statistically significant

Supplementary Table 9: Adjusted associations of cannabis use with pre-bronchodilator IOS measures among the sub-sample who never reported asthma.

| Pre-bronchodilator |          | IOS Measures <sup>a</sup> |              |              |              |              |              |
|--------------------|----------|---------------------------|--------------|--------------|--------------|--------------|--------------|
|                    |          | R5                        | R20          | R5-R20       | X5           | AX           | Fres         |
|                    | <i>n</i> | 603                       | 603          | 603          | 602          | 596          | 597          |
| Joint Years        | $\beta$  | <b>0.135</b>              | <b>0.100</b> | <b>0.111</b> | <b>0.111</b> | <b>0.144</b> | <b>0.156</b> |
|                    | 95% CI   | 0.047-0.223               | 0.004-.0196  | 0.026-0.197  | 0.03-0.191   | 0.063-0.225  | 0.073-0.239  |
|                    | <i>p</i> | 0.003                     | 0.041        | 0.011        | 0.007        | 0.001        | <0.001       |
| Pack-years         | $\beta$  | 0.025                     | 0.015        | 0.041        | 0.002        | 0.016        | 0.018        |
|                    | 95% CI   | -0.062-0.113              | -0.081-0.110 | -0.044-0.126 | -0.077-0.082 | -0.066-0.098 | -0.065-0.101 |
|                    | <i>p</i> | 0.571                     | 0.763        | 0.342        | 0.952        | 0.694        | 0.671        |

<sup>a</sup> All IOS measures are log-transformed and analyses are adjusted for adjusted for sex, BMI, and height as well as both substances; bolded values are statistically significant.
